# Supplementary material
Source: publisher site journal article supplement (https://www.dovepress.com/article/369086)
Supplement: Supplementary file 1 [file get_supplementary_file.php]

Supplementary table 1: Baseline characteristics of the 24 PsI-DLBCL patients in our hospital

| Patient  no. | Year of diagnosis | Sex | Age | Stage | Marital status | Insurance | HAN’S | CD5 express | LDH | DE | IPI score |
| --- | --- | --- | --- | --- | --- | --- | --- | --- | --- | --- | --- |
| 1 | 2016 | M | 52 | IV | Unmarried | Yes | N-GCB | CD5- | Normal | No | 1 |
| 2 | 2017 | M | 66 | II | Married | No | GCB | CD5- | Normal | No | 1 |
| 3 | 2020 | M | 53 | II | Married | No | GCB | CD5- | Normal | No | 2 |
| 4 | 2018 | F | 73 | IV | Married | Yes | N-GCB | CD5- | Elevated | No | 3 |
| 5 | 2014 | F | 48 | IV | Married | Yes | GCB | CD5+ | Elevated | No | 2 |
| 6 | 2016 | M | 58 | IV | Married | Yes | N-GCB | CD5+ | Normal | No | 2 |
| 7 | 2016 | M | 29 | II | Married | Yes | GCB | CD5- | Normal | No | 0 |
| 8 | 2017 | F | 64 | II | Married | Yes | N-GCB | CD5- | Normal | No | 1 |
| 9 | 2018 | F | 89 | IV | Married | Yes | N-GCB | CD5- | Elevated | No | 4 |
| 10 | 2019 | M | 71 | IV | Married | No | NA | CD5- | Normal | No | 3 |
| 11 | 2021 | M | 63 | IV | Married | No | NGCB | CD5- | Elevated | No | 3 |
| 12 | 2018 | F | 79 | IV | Married | No | NGCB | CD5- | Normal | No | 3 |
| 13 | 2018 | F | 53 | IV | Married | Yes | N-GCB | CD5+ | Normal | No | 2 |
| 14 | 2020 | M | 48 | IV | Married | No | N-GCB | CD5- | Elevated | No | 3 |
| 15 | 2016 | F | 60 | IV | Married | Yes | N-GCB | CD5- | Elevated | No | 2 |
| 16 | 2018 | F | 79 | IV | Married | Yes | GCB | CD5- | Elevated | No | 3 |
| 17 | 2014 | M | 49 | IV | Married | Yes | N-GCB | CD5- | Normal | No | 1 |
| 18 | 2017 | F | 33 | IV | Married | Yes | N-GCB | CD5- | Normal | No | 1 |
| 19 | 2014 | M | 67 | IV | Married | Yes | N-GCB | CD5- | Elevated | No | 3 |
| 20 | 2019 | M | 61 | II | Married | Yes | GCB | CD5- | Normal | No | 1 |
| 21 | 2019 | F | 66 | II | Married | No | N-GCB | CD5- | Normal | Yes | 1 |
| 22 | 2017 | M | 53 | I | Married | Yes | N-GCB | CD5- | Normal | No | 0 |
| 23 | 2020 | M | 76 | IV | Married | Yes | NGCB | CD5- | Normal | No | 3 |
| 24 | 2017 | M | 56 | II | Married | Yes | GCB | CD5- | Elevated | No | 2 |

F: Female, M: Man; Lugano - Ann Arbor；GCB: Germinal center B cells; N-GCB: Non- germinal center B cells; Normal level of LDH<250mmol/L, DE: Double expression defined as MYC expression ≥ 40% and BCL2 expression ≥ 50%. The races of 24cases were Asian.

Continued Supplementary table1

| Patient no. | Radiation recode | surgery recode | Reason directed surgery | Chemotherapy recodes | Out come | Survival months |
| --- | --- | --- | --- | --- | --- | --- |
| 1 | None | Surgery | Diagnostic surgery | 4CHOP | Alive | 54 |
| 2 | None | Surgery | Intestinal obstruction | 4RCHOP | Alive | 49 |
| 3 | None | None | - | None | Dead | 7 |
| 4 | None | Surgery | Intestinal obstruction | 4CHOP ,4RCHOP | Alive | 48 |
| 5 | None | Surgery | Diagnostic surgery | 4CHOP | Dead | 19 |
| 6 | None | Surgery | Intestinal obstruction | 8RCHOP,6RGDP | Alive | 51 |
| 7 | None | Surgery | Intestinal obstruction | CHOP | Unknown | 37 |
| 8 | None | Surgery | Intestinal obstruction | 5CHOP, 4GDP | Alive | 52 |
| 9 | None | Surgery | Intestinal bleeding | None | Dead | 2 |
| 10 | None | None | - | None | Dead | 8 |
| 11 | None | Surgery | Intestinal obstruction | 6RCHOP. Hepatitis B outbreak | Dead | 11 |
| 12 | None | Surgery | Intestinal obstruction | None | Alive | 34 |
| 13 | Radiation | None | - | 6RCHOP | Alive | 34 |
| 14 | None | Surgery | Diagnostic surgery | None | Dead | 2 |
| 15 | None | None | - | 6RCHOP | Alive | 68 |
| 16 | None | None | - | 4RCHOP | Alive | 42 |
| 17 | None | None | - | 6CHOP, 6CHOP, 4GDP | Alive | 65 |
| 18 | None | Surgery | Diagnostic surgery | 6RCHOP | Alive | 60 |
| 19 | None | Surgery | Diagnostic surgery | 6RCHOP | Alive | 68 |
| 20 | Radiation | Surgery | Intestinal obstruction | 6CHOP | Alive | 30 |
| 21 | None | Surgery | Intestinal perforation | CHOP+ Lenalidomide | Alive | 30 |
| 22 | Radiation | None | - | 8RCHOP | Alive | 49 |
| 23 | None | None | - | 4RCHOP. Hepatitis B outbreak | Dead | 12 |
| 24 | Radiation | None | - | 8CHOP | Alive | 50 |

-:nothing, CHOP (cyclophosphamide, doxorubicin / pirarubicin, vincristine, prednisone), GDP (gemcitabine, dexamethasone, cisplatin), R (Rituximab), lenalidomide(Revlimid), outcome: Vital status recode (study cutoff used).
